# Supplementary material for: Dual-mTOR Inhibitor Rapalink-1 Reduces Prostate Cancer Patient-Derived Xenograft Growth and Alters Tumor Heterogeneity
Source: PubMed Central journal article supplement (PMC7324765; doi:10.3389/fonc.2020.01012), 2020-06-23

# Supplementary Figure 1

**A**

| Condition         | Viability     | CD44 <sup>+</sup> | ALDH <sup>hi</sup> |
|-------------------|---------------|-------------------|--------------------|
| DMSO, 0.1%        | 68.2 ± 9.5 %  | 6.2 ± 3.4 %       | 2.2 ± 1.7 %        |
| Disulfiram, 0.1μM | 68.9 ± 9.9 %  | 5.5 ± 3.0 %       | 4.4 ± 4.7 %        |
| Rapalink-1, 0.1μM | 65.9 ± 12.2 % | 4.1 ± 0.6 %       | 1.4 ± 0.5 %        |

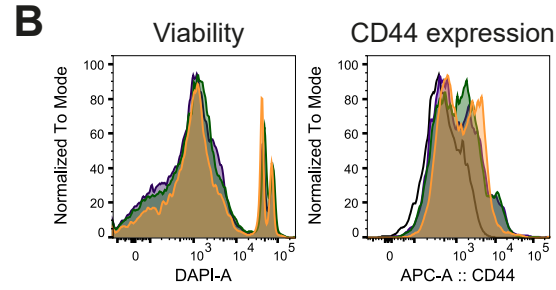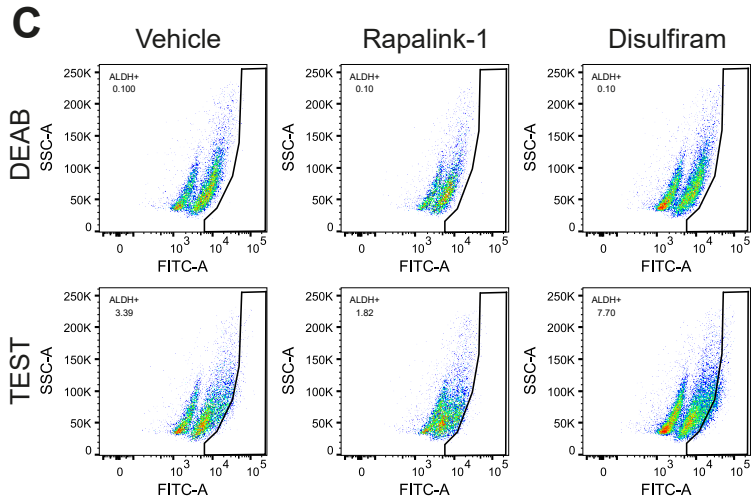

Supplementary Figure 2

**A**

Original

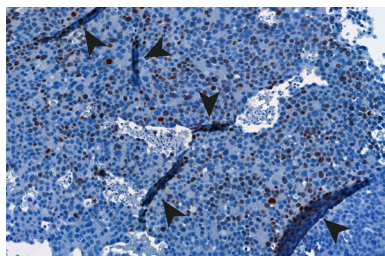

Untreated

processed with macro

1

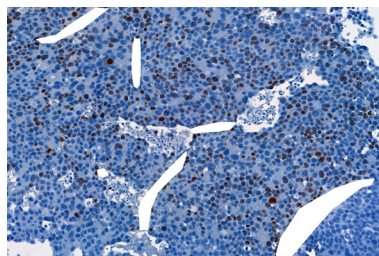

2

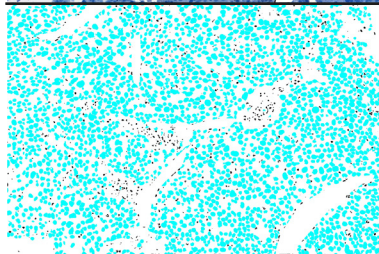

4

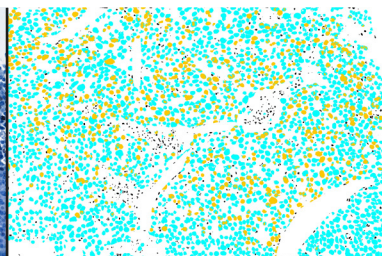

3

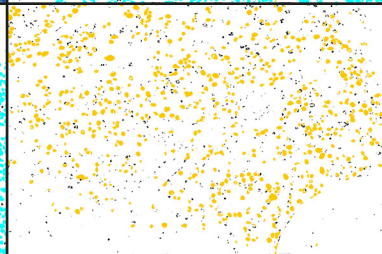

**B**

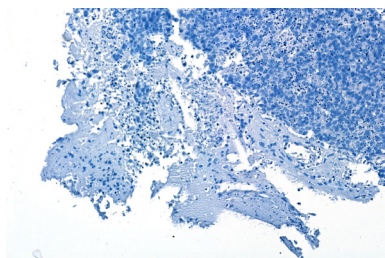

Rapalink-1, 10  $\mu$ M

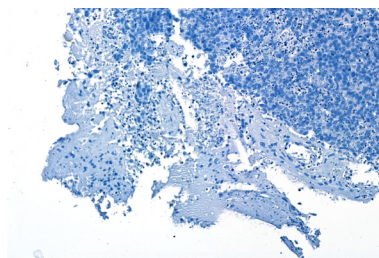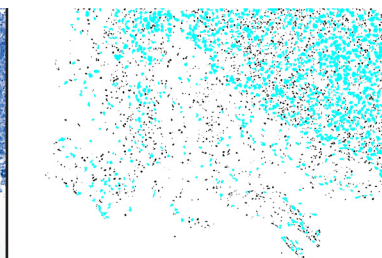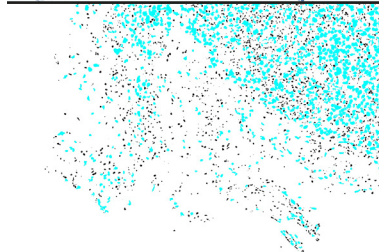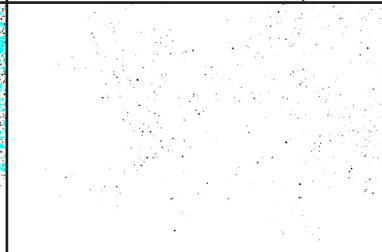

**C**

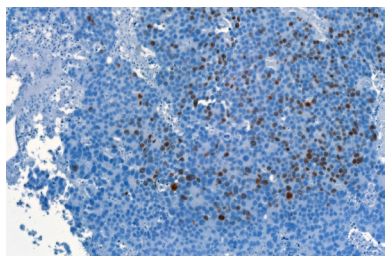

Rapamycin, 10  $\mu$ M

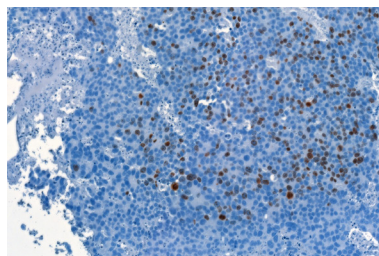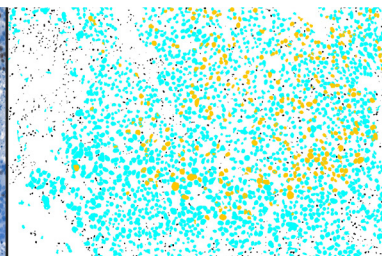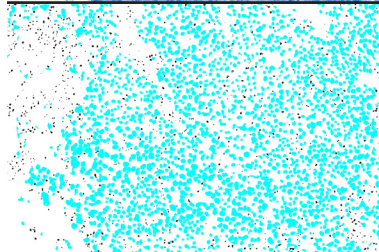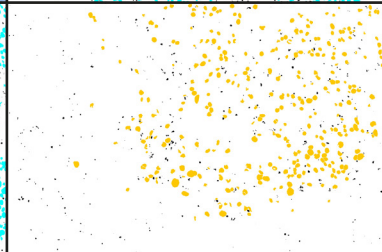

Supplementary Figure 3

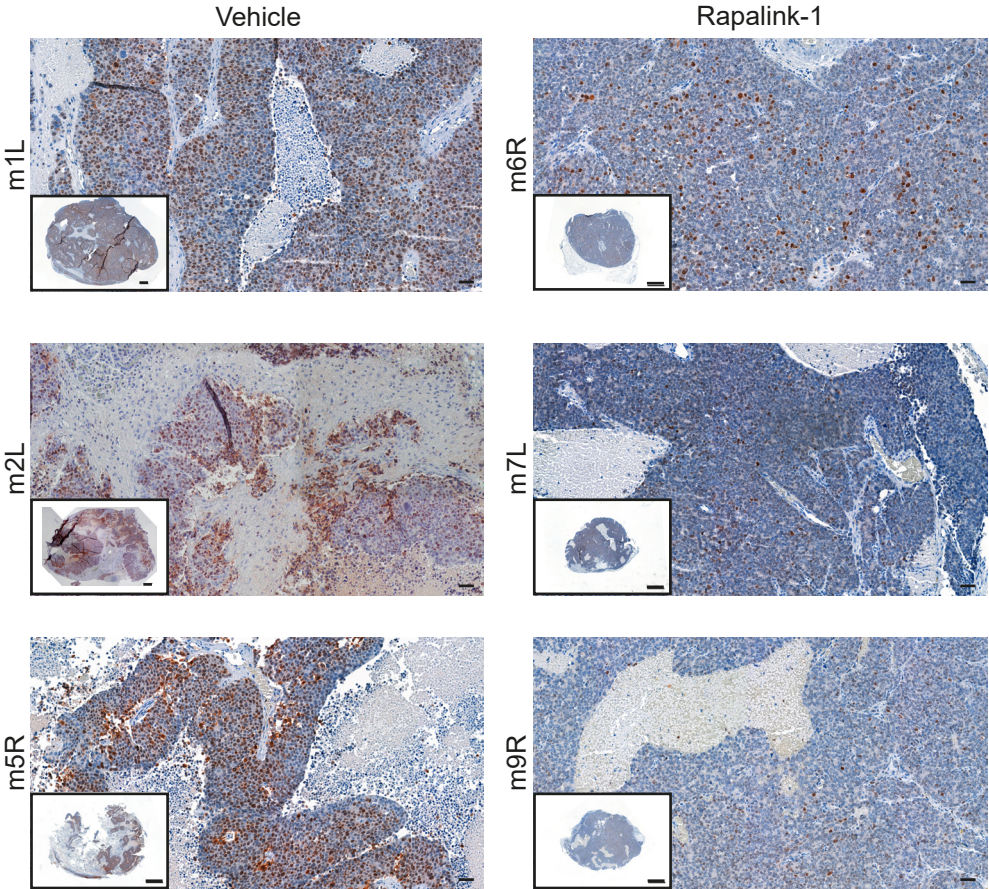

Supplement: Data_Sheet_1.pdf [file Data_Sheet_1.pdf]
