# Supplementary material for: Dual-mTOR Inhibitor Rapalink-1 Reduces Prostate Cancer Patient-Derived Xenograft Growth and Alters Tumor Heterogeneity
Source: Front Oncol. 2020 Jun 23;10:1012. doi: 10.3389/fonc.2020.01012 (PMC7324765; doi:10.3389/fonc.2020.01012)
Supplement: Supplementary file 1 [file Table_1.XLSX]

## Sheet: Ab for WB analysis
Antibody	Catalog Number	Company
pSer473 AKT	4060	Cell Signaling
AKT	9272	Cell Signaling
pSer240/244 S6	2215	Cell Signaling
S6	2317	Cell Signaling
pSer243 GFAT1	Generated from GenScript
GFAT1	ab125069	Abcam
Actin	sc-47778	Santa Cruz
pSer757 ULK1	6888	Cell Signaling
ULK1	8054	Cell Signaling
pThr172 AMPKa	2535	Cell Signaling
AMPKa	5831	Cell Signaling
ACC	3676	Cell Signaling
HK2	2867	Cell Signaling
GS	GTX109121	GeneTex
CAD	11933	Cell Signaling
ACL	4332	Cell Signaling
LDHA	2012	Cell Signaling
NAGK	15051-1-AP	Proteintech Group
GLS	12855-1-AP	Proteintech Group
pThr389 S6K1	9206	Cell Signaling
S6K1	9202	Cell Signaling

## Sheet: Ab for IHC
Antibody	Catalog Number	Company
Ki67	GTX16667	GeneTex
panCK	MA5-13203	Thermo Fisher Scientific

## Sheet: PCa Organoids medium
Prostate cancer organoid medium composition
	Component	Stock concentration	Volume added	Final concentration	Producer	Cat. Number
	Basis medium		9.1 ml
	FCS	1	500 μl	0.05	Thermo Fischer Scientific	10270-106
	B27	50x	200 μl	1x	Thermo Fischer Scientific	17504044
	Nicotinamide	1 M	100 μl	10 mM	Sigma	N0636
	R-Spondin	100 μg/ml	50 μl	500 ng/ml	Peprotech	120-38
	N-acetyl-cysteine	500 mM	25 μl	1.25 mM	Sigma	A9165
	SB202190	10 mM	10 μl	10 μM	Selleckchem	S1077
	Noggin	100 μg/ml	10 μl	100 ng/ml	Peprotech	250 38
	Y-27632	10 mM	10 μl	10 μM	Selleckchem	S1049
	Wnt3A	10 μg/ml	10 μl	10 ng/ml	Peprotech	315-20
	HGF	50 ng/ μl	10 μl	50 ng/ml	Peprotech	100-39
	A83-01	1 mM	5 μl	500 nM	Tocris	2939
	EGF	500 μg/ml	1 μl	50 ng/ml	Peprotech	AF-100-15
	FGF10	100 μg/ml	1 μl	10 ng/ml	Peprotech	100-26
	FGF2	10 μg/ml	1 μl	1 ng/ml	Peprotech	100-18B
	PGE2	10 mM	1 μl	1 μM	Tocris	2296
	DHT	10 μM	10 μl	10 nM	Sigma	10300
			Total volume 10ml
